# Supplementary material
Source: ML conference proceedings conference paper supplement (https://openaccess.thecvf.com/content/ICCV2021/html/Mangalam_From_Goals_Waypoints_ICCV_2021_paper.html)
Supplement: Supplementary file 2 [file Mangalam_From_Goals_Waypoints_ICCV_2021_supplemental.zip]

Archive with 3 entries (3 files):
- supp_fig_2.gif
- 02871-supp.pdf
- main_fig_7.gif
