# Supplementary material
Source: ML conference proceedings conference paper supplement (https://openaccess.thecvf.com/content/ICCV2021/html/Mangalam_From_Goals_Waypoints_ICCV_2021_paper.html)

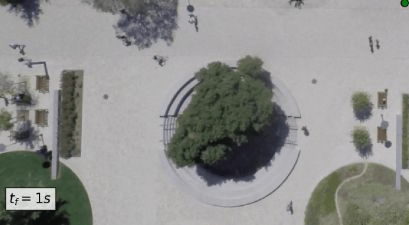

Supplement: Supplementary file 2 [file Mangalam_From_Goals_Waypoints_ICCV_2021_supplemental.zip › supp_fig_2.gif]

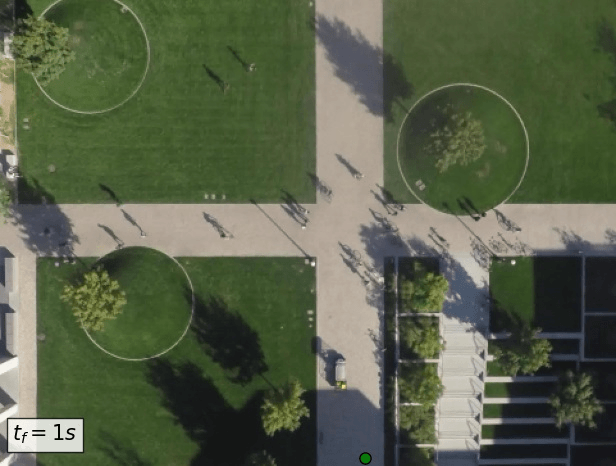

Supplement: Supplementary file 2 [file Mangalam_From_Goals_Waypoints_ICCV_2021_supplemental.zip › main_fig_7.gif]
